# Supplementary material
Source: publisher figshare collection journal article supplement (https://tandf.figshare.com/ndownloader/files/30845244)
Supplement: Supplementary file 1 [file 30845244]

Supplementary Material for:

Propagation of radar rainfall uncertainties into urban pluvial flood modeling during the North American monsoon

Annika Hjelmstad(1),(2), Ashish Shrestha(1), Margaret Garcia(1), and Giuseppe Mascaro(1)

1. School of Sustainable Engineering and the Built Environment, Arizona State University, Tempe, AZ, USA
2. Department of Civil and Environmental Engineering, Henry Samueli School of Engineering, University of California at Irvine


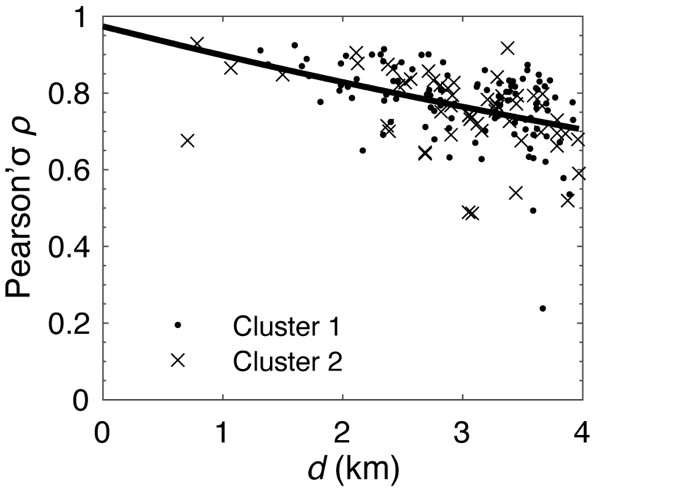


**Figure S1.** Spatialcorrelogram using the Pearson’s correlation coefficient, *ρ*, between the rainfall time series at a 1-hour resolution of gages with inter-distance, *d*, below 4 km. The line shows the relation , with parameters *r0* and *d0* fitted to the sample data. For reference, different markers are used to indicate gages belonging to the two clusters shown in Fig. 1a.


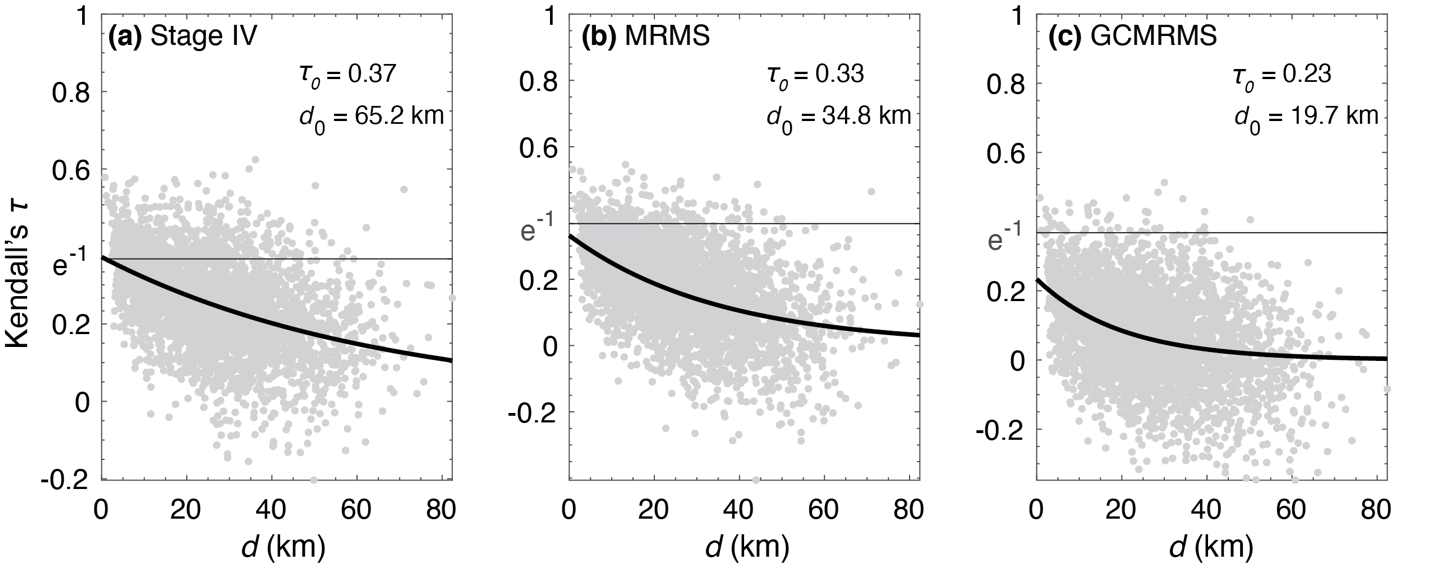


**Figure S2.** Spatial correlograms of (a) Stage IV, (b) MRMS, and (c) GCMRMS random errors with correlations computed using Kendall’s 𝜏. In each panel, the line shows the relation with parameters *t0* and *d0* fitted to the sample data and reported in the top right corner. The correlations are calculated for errors computed when both gauge and radar measured nonzero values, since the error model is not defined for either or .


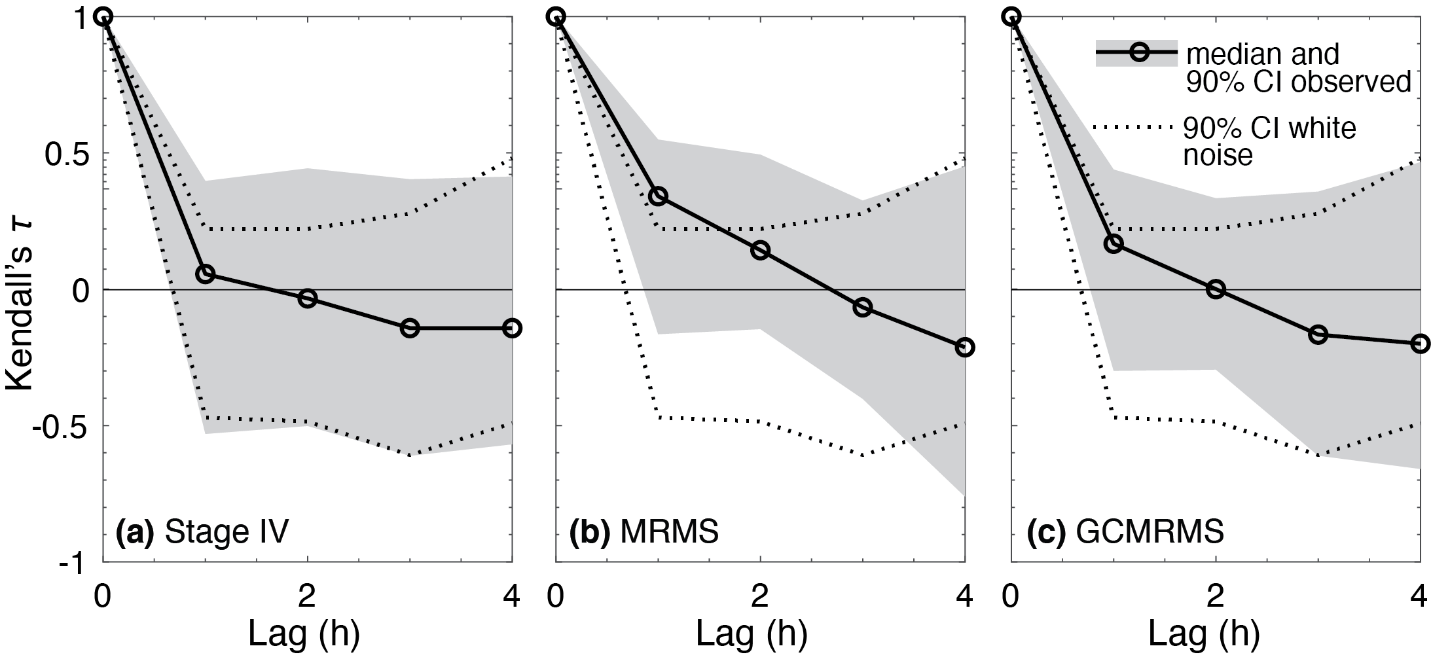


**Figure S3.** Median and 90% confidence interval (CI) of the autocorrelation function of the random errors, *e*(*Rr*), for *N* = 462 individual storms across the 85 pixels in cluster 2, and of white noise for *N* = 462 time series with the same duration of the observed events.

**
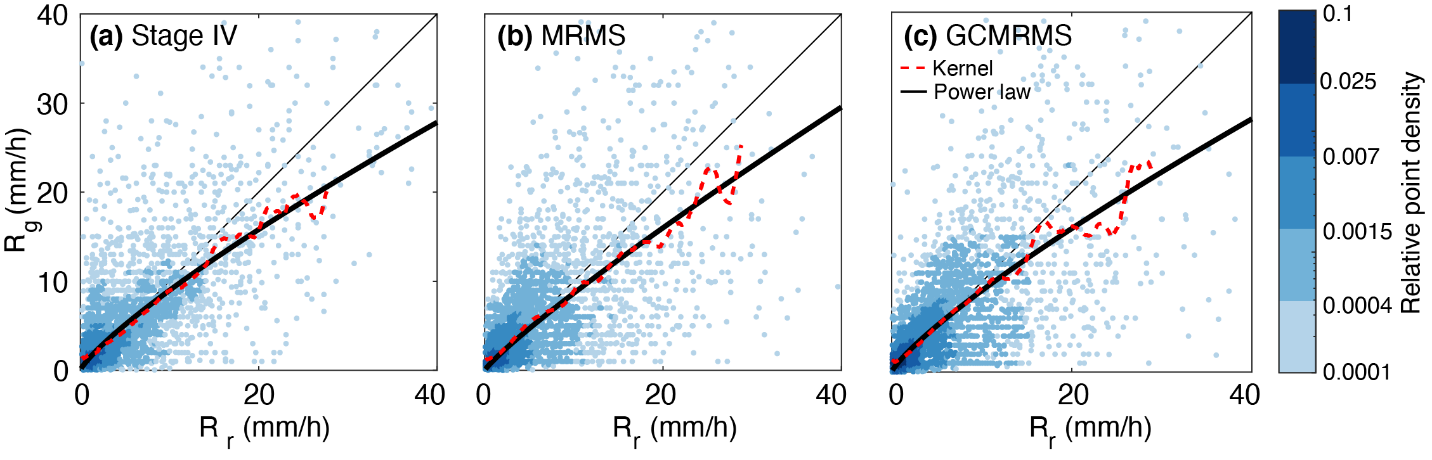
**

**Figure S4.** Scatterplots of radar rainfall estimates, *Rr*, and true rainfall approximated by the gage estimates, *Rg*, for cluster 1. A total of 8,194, 8,218, and 8,048 non-zero pairs for (a) Stage IV, (b) MRMS, and (c) GCMRMS are shown using different colors based of their relative frequency. In each panel, the dashed red line is the systematic component estimated with the Epanechnikov kernel, and the solid black line is the power law of equation (5). Parameters of the power law are *a* = 1.37, *b* = 0.82 for Stage IV; *a* = 1.13, *b* = 0.89 for MRMS; and *a* = 1.37, *b* = 0.82 for GCMRMS.

**
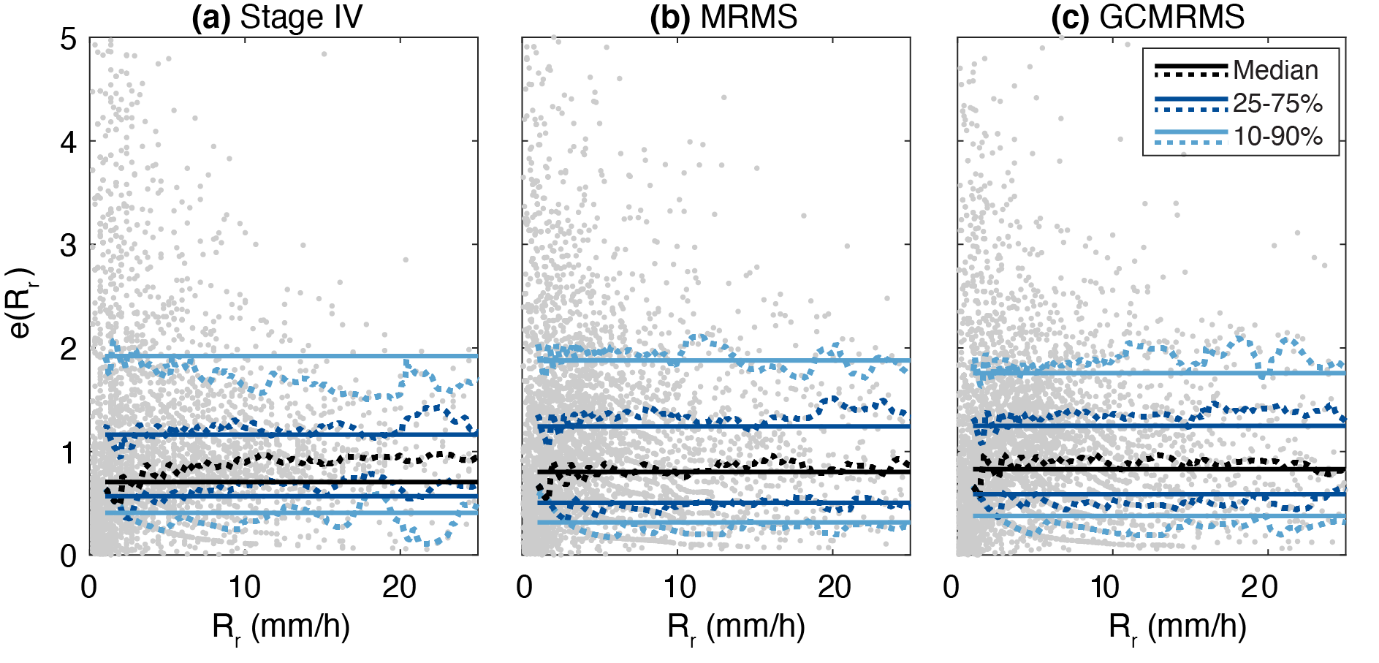
**

**Figure S5.** Relations between *e*(*Rr*) and *Rr* for the different radar products, along with quantiles of the empirical (dotted lines) and mixed gamma (solid lines) distributions for cluster 1.

**
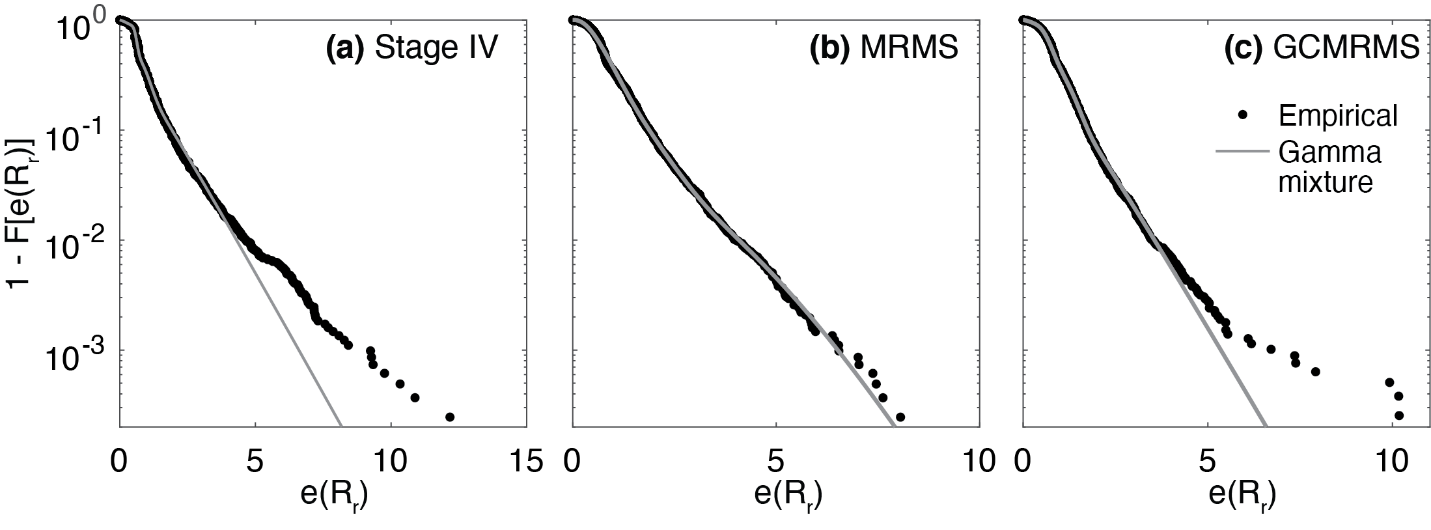
**

**Figure S6.** Comparison of survival functions of the empirical and mixture of three gamma distribution for cluster 1.

**Figure S7.** Uncertainty of flood extent maps for the storm on July 23, 2017 simulated by PCSWMM under (a)-(c) Stage IV, (d)-(f) MRMS, and (g)-(i) GCMRMS products. See text for additional explanations.

**Figure S8.** As Fig. 9 but forthe storm on September 23, 2019.

|  | **One** | **Two** | **Three** |
| --- | --- | --- | --- |
| Stage IV | 14,037 | 10,966 | 10,269 |
| MRMS | 15,199 | 14,467 | 14,473 |
| GCMRMS | 13,732 | 13,187 | 12,695 |

**Table S1.** Akaike Information Criterion values for one gamma distribution and mixtures of two and three gamma distributions used to describe the distribution of the random errors for each radar product.
